# Supplementary figures and images for: A Description of Telemental Health Services Provided by the Veterans Health Administration in 2006–2010
Source: Atypon-hosted journal article supplement (doi:10.1176/appi.ps.201100458), 2012-11-01

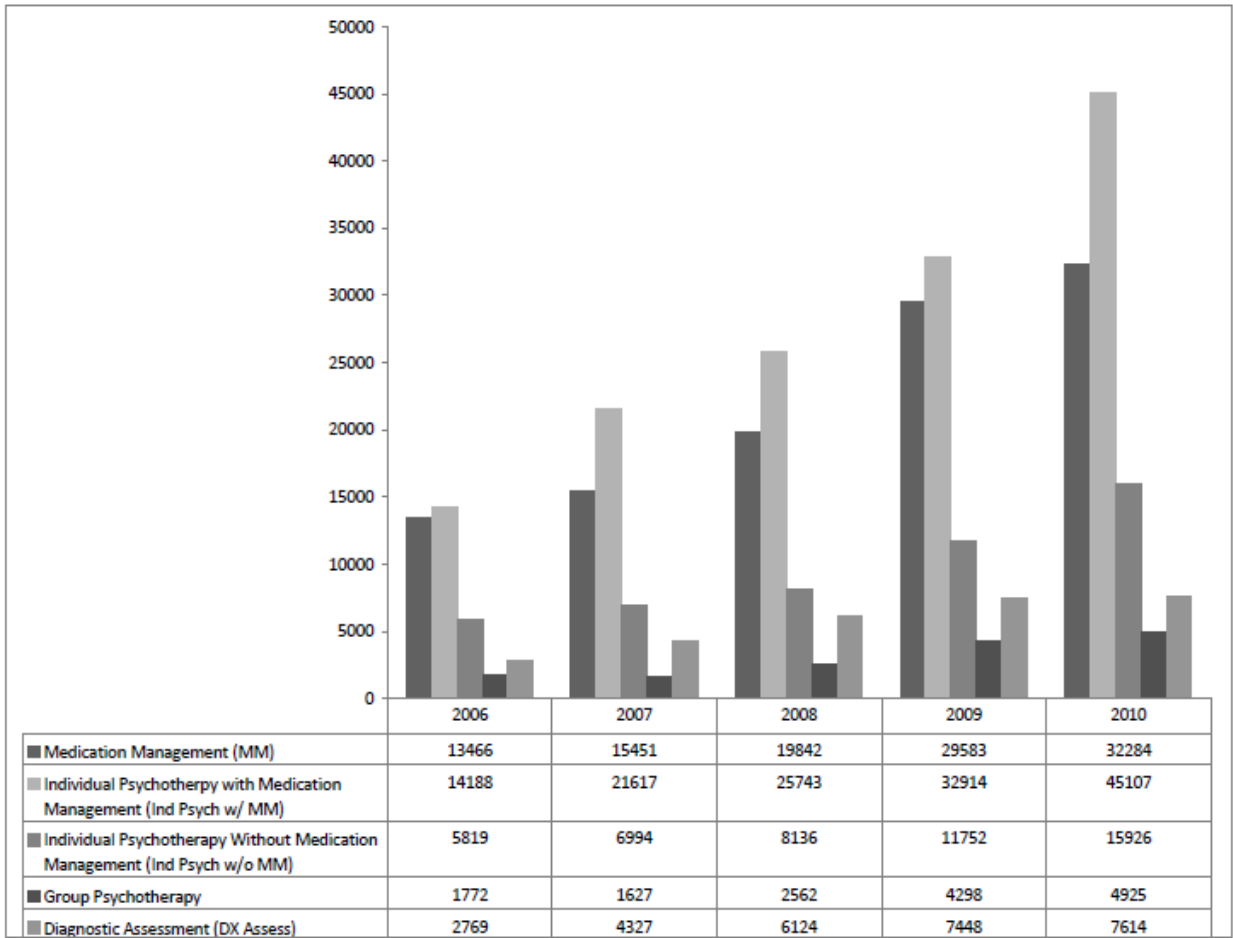

Supplement: 1131_ds001.pdf [file 1131_ds001.pdf]
